# Supplementary material for: Anion-driven supramolecular modulation of spin-crossover properties in mononuclear iron(iii) Schiff-base complexes
Source: Royal Society of Chemistry journal article supplement (doi:10.1039/d1dt02394b), 2021-01-01
Supplement: d1dt02394b1.pdf [file d1dt02394b1.pdf]

# Supporting Information

## Anion-driven supramolecular modulation of Spin-Crossover properties in mononuclear Iron(III) Schiff-base Complexes

Zong-Mei Yu<sup>a</sup>• Sheng-Ze Zhao<sup>a</sup>• Yu-Ting Wang<sup>a</sup>• Peng-Yu Xu<sup>a</sup>• Chun-Yan

Qin<sup>a</sup>•Yong-Hua Li<sup>a\*</sup>•Xin-Hui Zhou<sup>a\*</sup>and Shi Wang<sup>a\*</sup>

<sup>a</sup> State Key Laboratory of Organic Electronics and Information Displays & Institute of Advanced Materials (IAM), Nanjing University of Posts & Telecommunications, 9 Wenyuan Road, Nanjing 210023, China.

E-mail: iamswang@njupt.edu.cn

**Table S1.** Hydrogen bond distances and parameters for the complexes of **1-4** (Å, °)

| <b>1-PF<sub>6</sub></b>    |         |         |          |         |                          |         |         |           |         |
|----------------------------|---------|---------|----------|---------|--------------------------|---------|---------|-----------|---------|
| <b>100K</b>                |         |         |          |         | <b>300K</b>              |         |         |           |         |
| D-H...A                    | D-H     | H...A   | D...A    | D-H...A | D-H...A                  | D-H     | H...A   | D...A     | D-H...A |
| N2-H9...F8                 | 0.83(3) | 2.22(3) | 3.027(3) | 164(3)  | N2-H9...F4               | 0.90(7) | 2.26(7) | 3.073(7)  | 150(6)  |
| N3-H14...F3 <sup>i</sup>   | 0.85(5) | 2.29(5) | 3.052(4) | 149(5)  | N3-H23...F5 <sup>i</sup> | 0.78(5) | 2.36(5) | 3.081(5)  | 154(5)  |
| <b>2-CIO<sub>4</sub></b>   |         |         |          |         |                          |         |         |           |         |
| <b>100K</b>                |         |         |          |         | <b>300K</b>              |         |         |           |         |
| D-H...A                    | D-H     | H...A   | D...A    | D-H...A | D-H...A                  | D-H     | H...A   | D...A     | D-H...A |
| N2-H9...O10 <sup>ii</sup>  | 0.89(4) | 2.14(4) | 2.938(5) | 149(4)  | N2-H9...O9               | 0.99(5) | 2.24(6) | 3.063(6)  | 139(5)  |
| N3-H14...O7                | 0.80(5) | 2.43(5) | 3.138(5) | 148(6)  | N6-H31...O12             | 0.90(6) | 2.33(6) | 3.076(10) | 140(6)  |
| N6-H31...O5 <sup>iii</sup> | 0.91(7) | 2.47(8) | 3.164(8) | 134(5)  | N7-H36...O10             | 0.80(6) | 2.49(6) | 3.099(10) | 134(3)  |
| N6-H31...O8 <sup>iii</sup> | 0.91(7) | 2.58(6) | 3.305(6) | 1.38(5) | N6-H31...O6              | 0.897   | 2.618   | 3.357     | 140     |
| N7-H36...O9 <sup>iv</sup>  | 0.84(4) | 2.33(4) | 3.048(6) | 143(3)  |                          |         |         |           |         |
| <b>3-I</b>                 |         |         |          |         |                          |         |         |           |         |

| 100K                     |         |         |          | 300K    |                         |      |       |           |         |
|--------------------------|---------|---------|----------|---------|-------------------------|------|-------|-----------|---------|
| D-H...A                  | D-H     | H...A   | D...A    | D-H...A | D-H...A                 | D-H  | H...A | D...A     | D-H...A |
| N2-H9...I2               | 0.89(5) | 2.80(5) | 3.624(6) | 155(4)  | N2-H9...I2 <sup>v</sup> | 0.91 | 2.96  | 3.776(8)  | 150     |
| N3-H14...I1              | 0.86(5) | 3.11    | 3.832    | 143     | N3-H14...I1             | 0.91 | 2.78  | 3.636(7)  | 157     |
| N6-H31...I1              | 0.88(6) | 2.88(6) | 3.678(6) | 152(4)  | N6-H31...I1             | 0.91 | 2.99  | 3.771(10) | 144     |
| N7-H36...I2 <sup>v</sup> | 0.86(6) | 3.05(6) | 3.773(6) | 143(4)  | N7-H36...I2             | 0.91 | 2.81  | 3.663(10) | 156     |

  

| 100K                      |         |         |          | 300K    |                             |         |         |          |         |
|---------------------------|---------|---------|----------|---------|-----------------------------|---------|---------|----------|---------|
| D-H...A                   | D-H     | H...A   | D...A    | D-H...A | D-H...A                     | D-H     | H...A   | D...A    | D-H...A |
| N2-H9...O7                | 0.95(5) | 2.02(5) | 2.932(6) | 162(5)  | N2-H9...O5 <sup>vii</sup>   | 0.80(4) | 2.19(4) | 2.963(5) | 163(4)  |
| N3-H14...O8 <sup>vi</sup> | 0.89(7) | 2.44(8) | 3.072(6) | 128(6)  | N3-H12...O9 <sup>viii</sup> | 0.80(5) | 2.51(6) | 3.108(6) | 133(5)  |
| N6-H31...O6               | 0.92(6) | 2.38(5) | 3.092(8) | 134(3)  | N6-H29...O7                 | 0.81(6) | 2.56(6) | 3.097(8) | 125(5)  |
| N7-H36...O8               | 0.78(6) | 2.27(6) | 3.021(7) | 164(6)  | N7-H34...O9                 | 0.80(6) | 2.29(6) | 3.048(7) | 159(5)  |

Symmetry codes: (i)-1/2+x, 1/2-y, z; (ii) x, y, 1+z; (iii)-1+x, y, z; (iv)-1/2+x, 1/2-y, 1/2+z; (v) 1/2+x, 1/2-y, 1/2+z; (vi) 1/2+x, 1/2-y, -1/2+z; (vii) x, y, -1+z; (viii)-1/2+x, 3/2-y, -1/2+z

**Table S2.** The variations of octahedral distortion parameters (°) for complexes **1-4**

| °                             | 1- PF <sub>6</sub> | 2-ClO <sub>4</sub> | 3-I           | 4-NO <sub>3</sub> |
|-------------------------------|--------------------|--------------------|---------------|-------------------|
|                               | 295 K → 100 K      | 295 K → 100 K      | 295 K → 100 K | 273 K → 100 K     |
| $\Delta\Sigma$ <sup>[a]</sup> | 34.7               | 22                 | 12.5          | 0.9               |
|                               |                    | 5                  | -13           | -5                |
| $\Delta\Theta$ <sup>[a]</sup> | 111                | 109                | 81            | 4                 |
|                               |                    | 30                 | -67           | -28               |

[a] for complex **1**,  $\Delta\Sigma = \Sigma_{HS} - \Sigma_{LS}$ ,  $\Delta\Theta = \Theta_{HS} - \Theta_{LS}$

**Table S3.** Distances between the intrachain and the planes ( $d_{plane}$ ) at different temperatures.

| Compound                 | 100K          |         |                 | 300K          |         |                 |
|--------------------------|---------------|---------|-----------------|---------------|---------|-----------------|
|                          | Intrachain(Å) |         | $d_{plane}$ (Å) | Intrachain(Å) |         | $d_{plane}$ (Å) |
|                          | Fe1-Fe1       | Fe2-Fe2 |                 | Fe1-Fe1       | Fe2-Fe2 |                 |
| <b>1-PF<sub>6</sub></b>  | 6.668         |         | 8.635           | 6.674         |         | 8.928           |
| <b>2-ClO<sub>4</sub></b> | 6.790         | 6.605   | 8.673           | 6.886         | 6.699   | 8.867           |
| <b>3-I</b>               | 6.894         | 6.682   | 8.472           | 6.947         | 6.770   | 8.661           |
| <b>4-NO<sub>3</sub></b>  | 6.851         | 6.659   | 8.409           | 6.944         | 6.756   | 8.517           |

**Table S4.** The shortest distances between the centroids of the aromatic fragments of the ligands ( $d_{cent}$ ), the distances between the centroids and the average plane in the closest neighbor ( $d_{CP}$ ), shift in the overlap ( $d_{shift}$ ), tilt angle ( $\Phi$ ).

| Compound          | 1     |       | 2     |       |       |       | 3     |       |       |       | 4     |       |       |       |
|-------------------|-------|-------|-------|-------|-------|-------|-------|-------|-------|-------|-------|-------|-------|-------|
|                   | 100   | 300   | 100   |       | 300   |       | 100   |       | 300   |       | 100   |       | 300   |       |
| Chain             | Fe    | Fe    | Fe1   | Fe2   |
| <i>d</i> cent (Å) | 4.540 | 4.573 | 4.486 | 4.759 | 4.524 | 4.446 | 4.582 | 4.477 | 4.608 | 4.565 | 4.481 | 4.592 | 4.558 | 4.663 |
| <i>d</i> CP(Å)    | 3.632 | 3.702 | 3.229 | 3.453 | 3.219 | 3.532 | 3.733 | 3.299 | 3.735 | 3.387 | 3.034 | 3.326 | 3.633 | 3.412 |
| <i>d</i> shift(Å) | 2.724 | 2.658 | 3.144 | 3.275 | 3.179 | 2.71  | 2.657 | 3.026 | 2.699 | 3.061 | 3.298 | 3.166 | 2.753 | 3.178 |
| $\phi$ (°)        | 25.6  | 24.   | 16.8  | 22.64 | 14.3  | 24.82 | 16.69 | 28.40 | 15.81 | 28.27 | 12    | 24.90 | 13.4  | 26.31 |

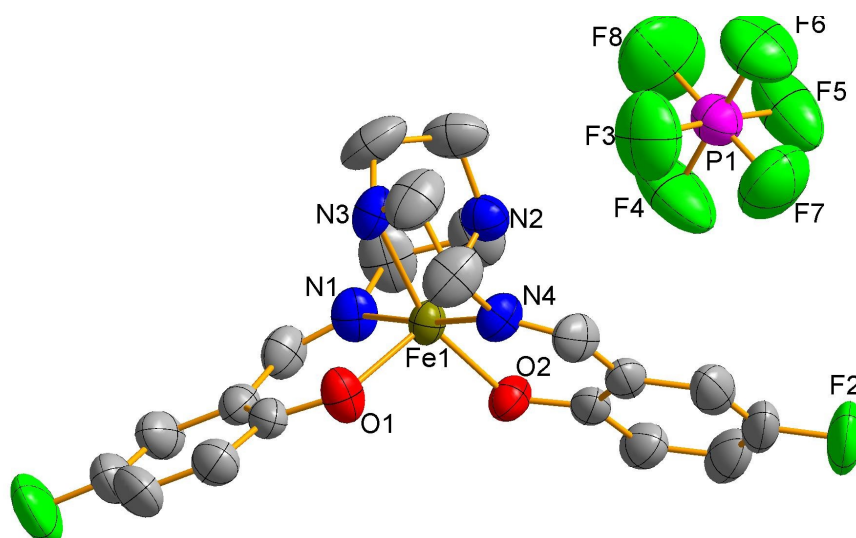

Figure S1. The molecular structure for complex **1** at 300 K, hydrogen atoms have been omitted for clarity. Thermal ellipsoids are drawn at 50% atomic probability.

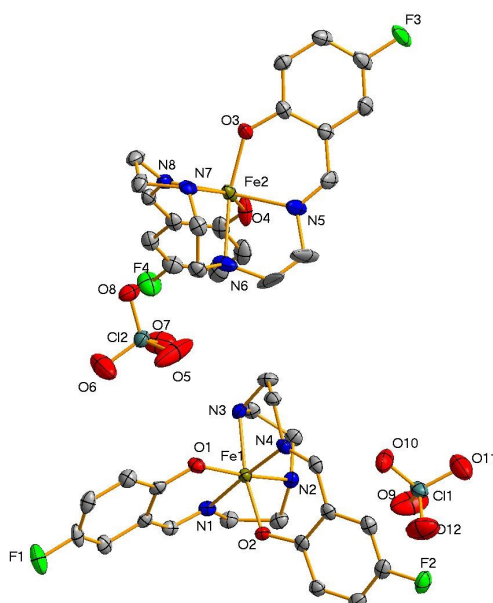

Figure S2. The molecular structure for complex **2** at 100 K, hydrogen atoms have been omitted for clarity. Thermal ellipsoids are drawn at 50% atomic probability.

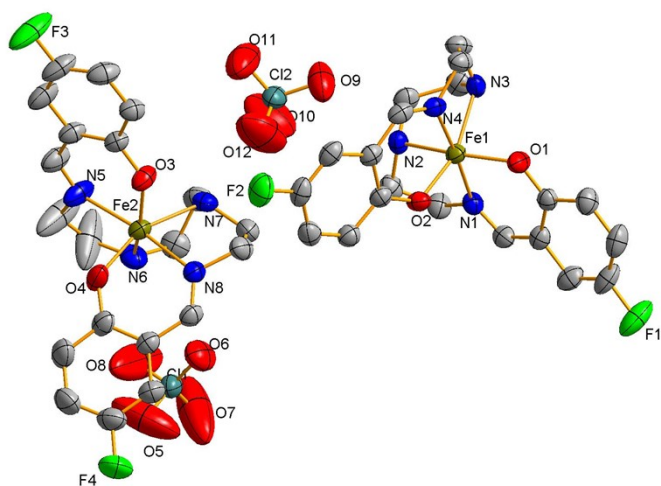

Figure S3. The molecular structure for complex **2** at 300 K, hydrogen atoms have been omitted for clarity. Thermal ellipsoids are drawn at 50% atomic probability.

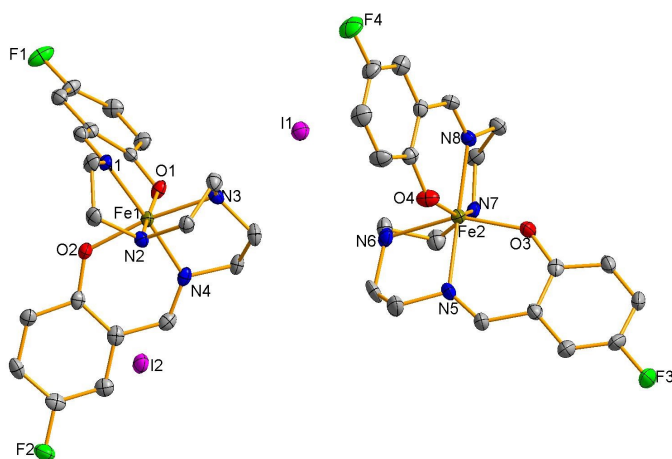

Figure S4. The molecular structure for complex **3** at 100 K, hydrogen atoms have been omitted for clarity. Thermal ellipsoids are drawn at 50% atomic probability.

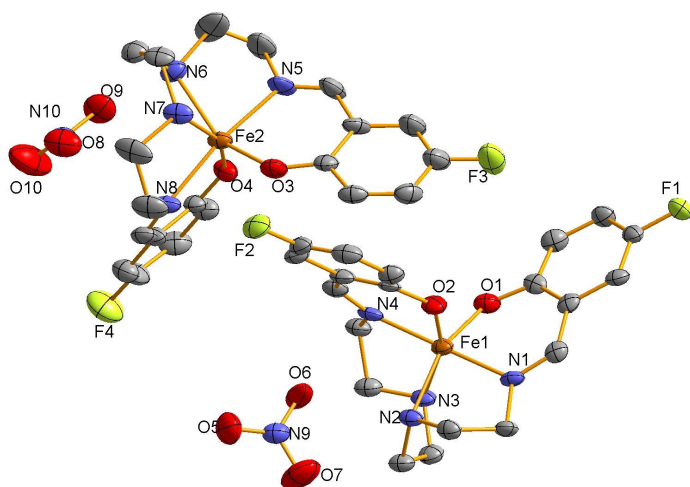

Figure S5. The molecular structure for complex **4** at 100 K, hydrogen atoms have been omitted for clarity. Thermal ellipsoids are drawn at 50% atomic probability.

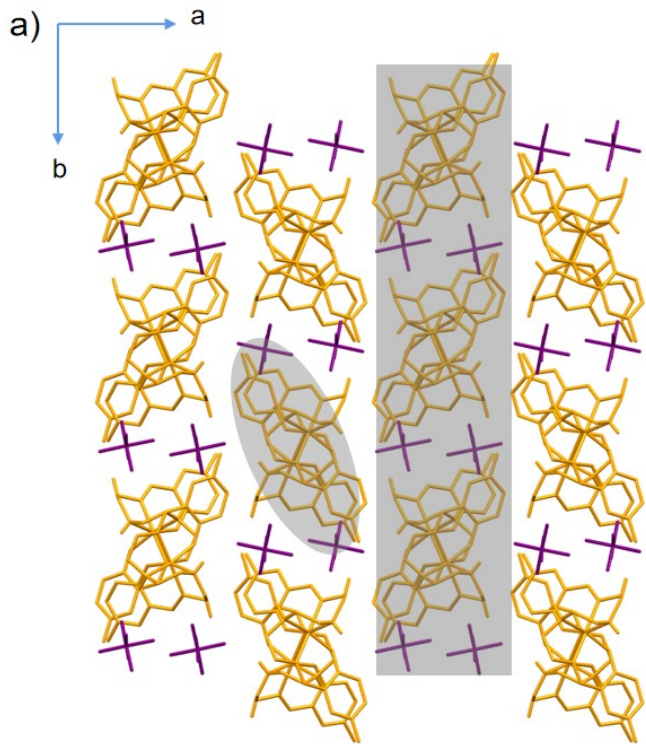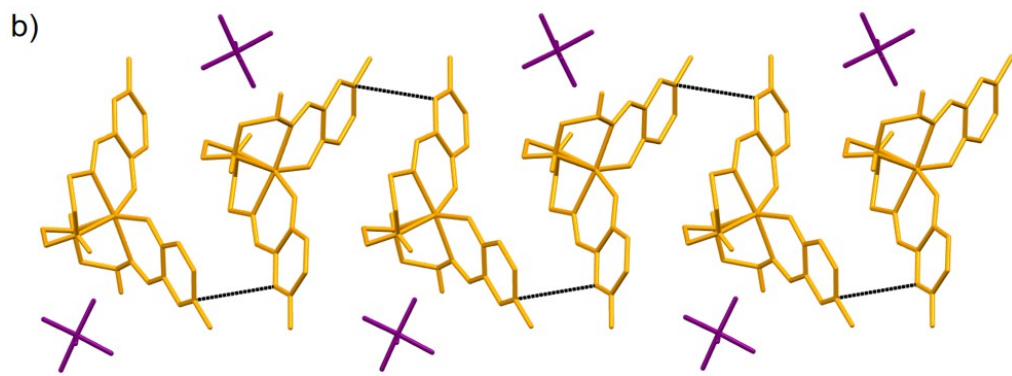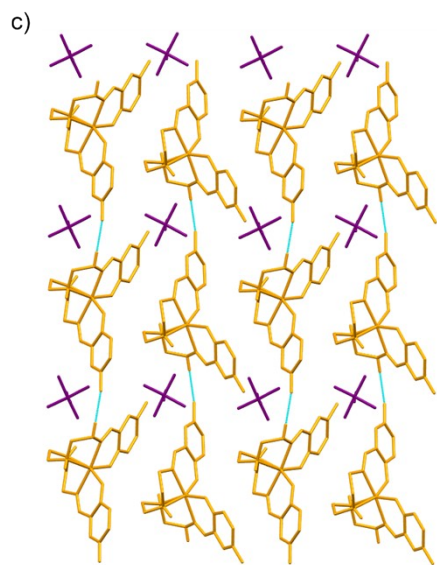

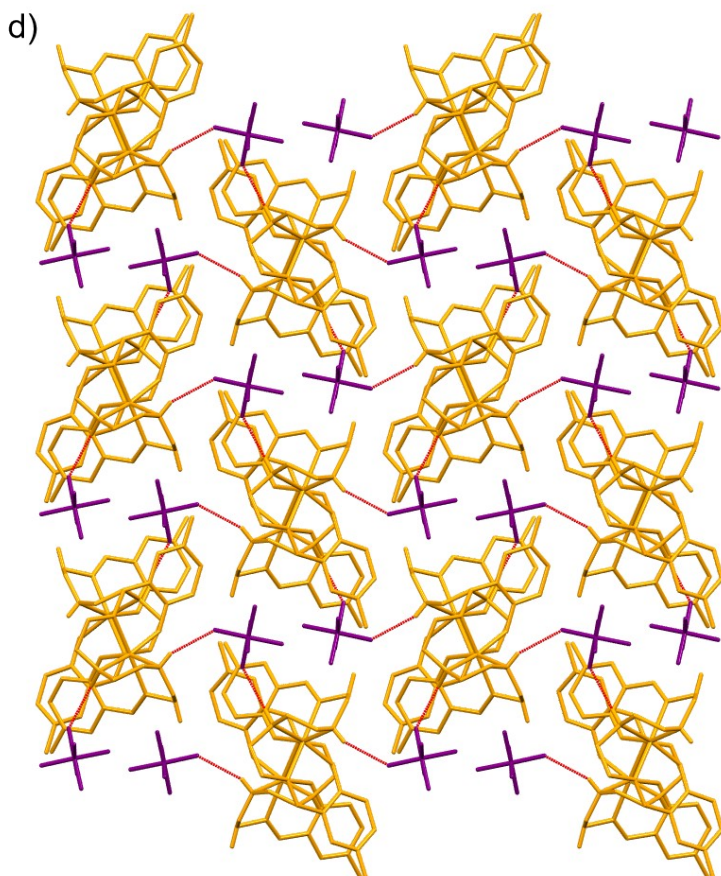

Figure S6. (a) Crystal packing of complex **1** at 300 K, viewed along the *c* axis, the 1D chain is shown in the light grey (ellipse) background and the layer-like unit is shown in the light grey (rectangle) background. (b) The chain viewed along the *a* axis, showing the C···C short contacts (black dotted line) between arene. (c) The C–H···F interactions (cyan dotted line) in **1** linking the chains into a plane. (d) The N–H···F hydrogen bonds (red dotted line) between the [Fe(5-F-sal-N-1,4,7,10)]<sup>+</sup> cations and PF<sub>6</sub><sup>-</sup> anions in **1** linking the plane into 3D network.

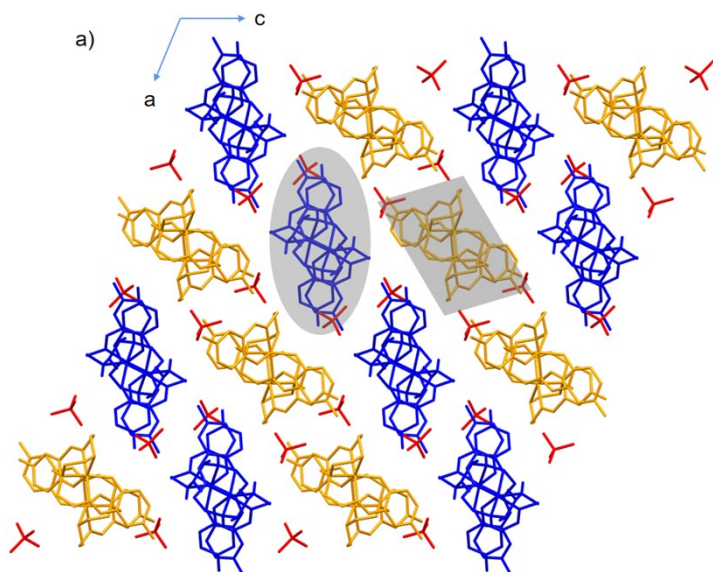

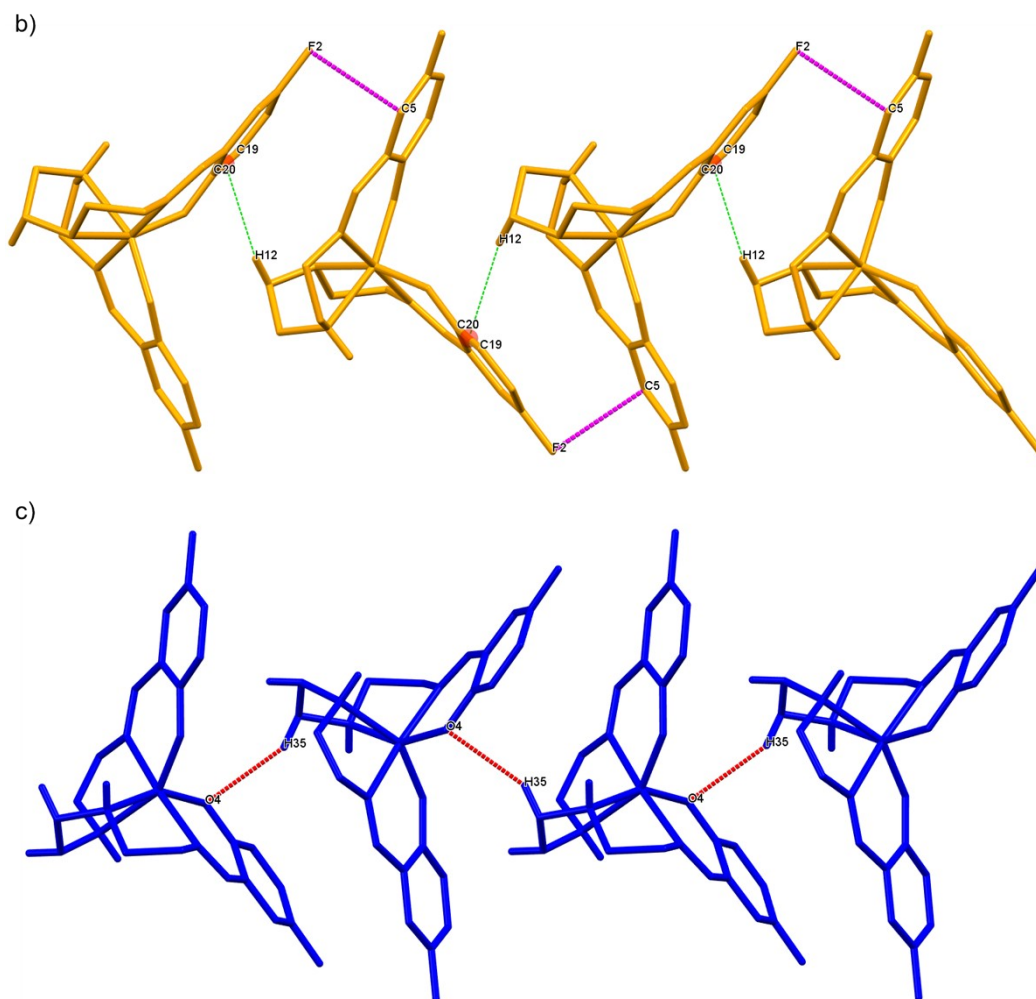

Figure S7. (a) Crystal packing of complex **2** at 300 K, viewed along the *b* axis. The Fe1 and Fe2 units are shown in orange and blue, respectively. (b) The formation of 1D Fe1 chain (rhombus background) by means of p- $\pi$  interactions (magenta dotted line) and C-H $\cdots$  $\pi$  (green dotted line) interactions. (c) The formation of 1D Fe2 chain (ellipse background) by means of C-H $\cdots$ O (red dotted line) interactions.

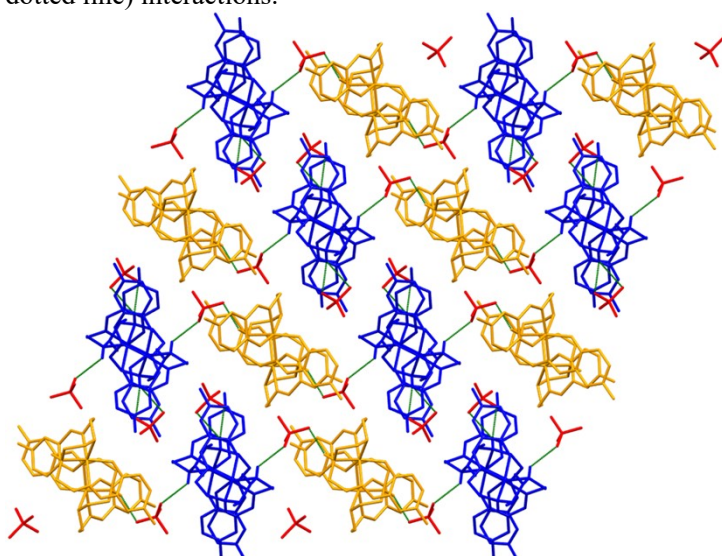

Figure S8. At 300K, N-H $\cdots$ O interactions (bottle green dotted line) linking the Fe1 and Fe2 centers in complex **2**. The Fe1 and Fe2 units are shown in orange and blue, respectively.

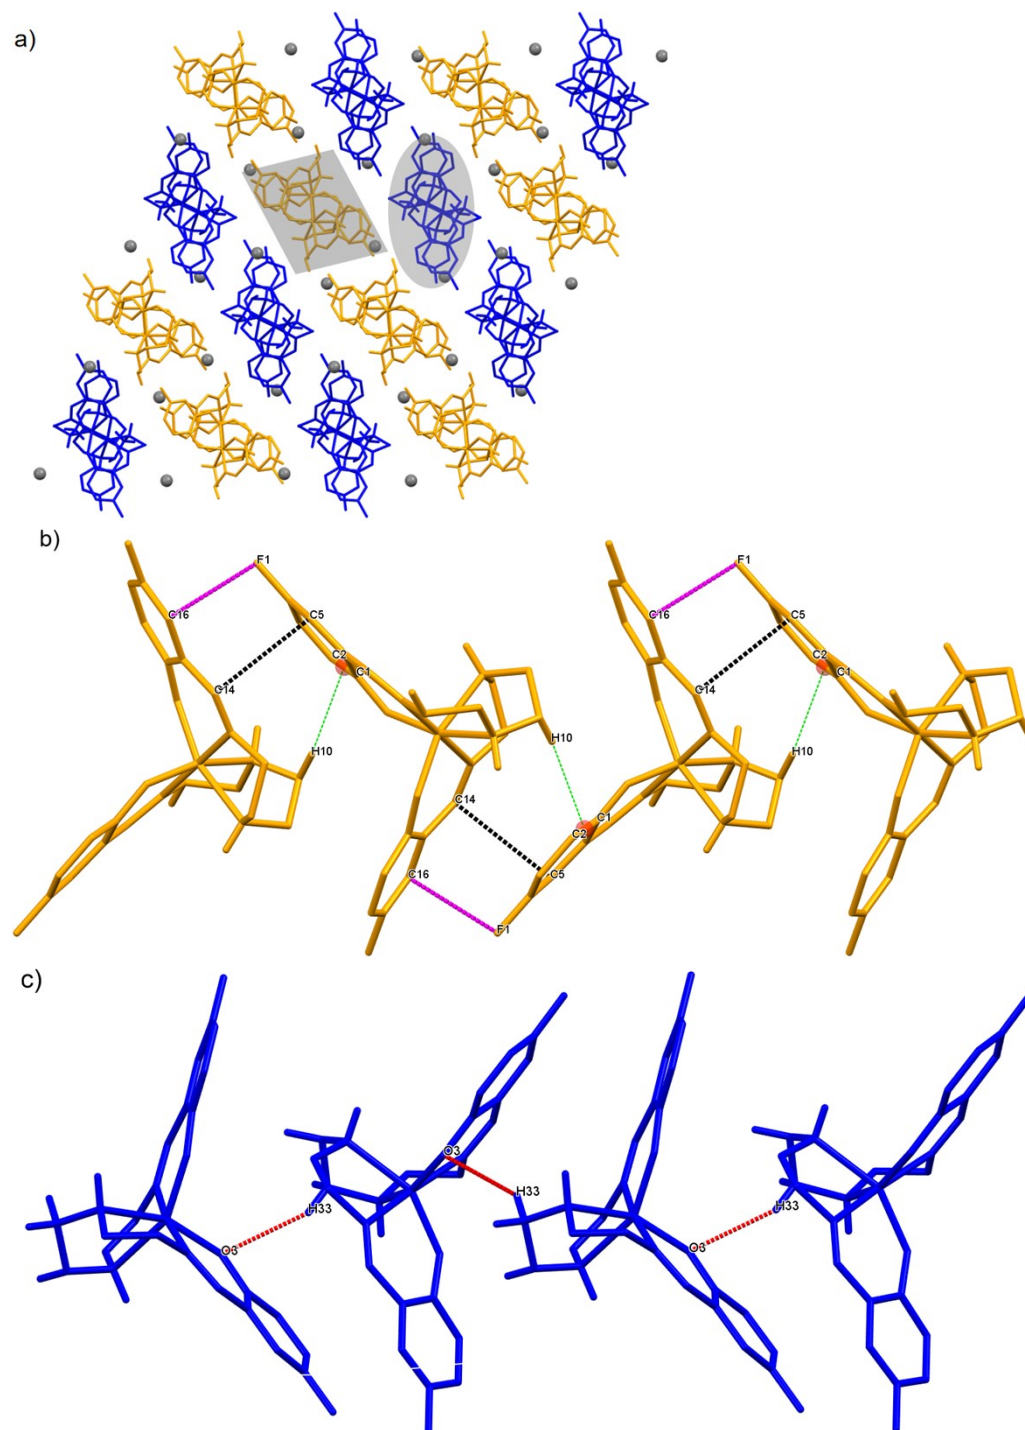

Figure S9. Crystal packing of complex **3** at 300 K, viewed along the *b* axis. The Fe1 and Fe2 units are shown in orange and blue, respectively. (b) The formation of 1D Fe1 chain (rhombus background) by means of  $C \cdots C$  short contacts (black dotted line),  $p-\pi$  (magenta dotted line) and  $C-H \cdots \pi$  (green dotted line) interactions. (c) The formation of 1D Fe2 chain (ellipse background) by means of  $C-H \cdots O$  (red dotted line) interactions.



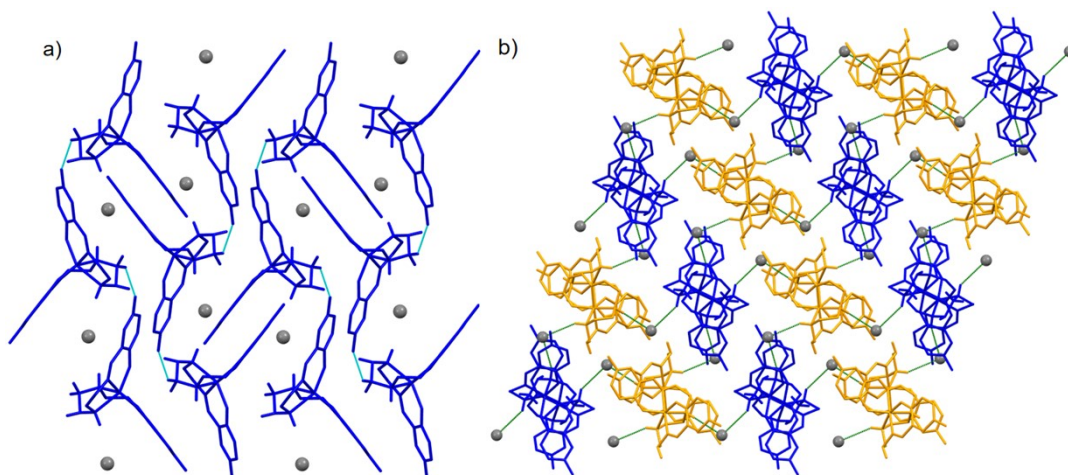

Figure S10. (a) C–H⋯F interactions (cyan dotted line) in **3** linking the chains into Fe2 plane. (b) N–H⋯I interactions (bottle green dotted line) linking the Fe1 and Fe2 centers in complex **3**. The Fe1 and Fe2 units are shown in orange and blue, respectively.

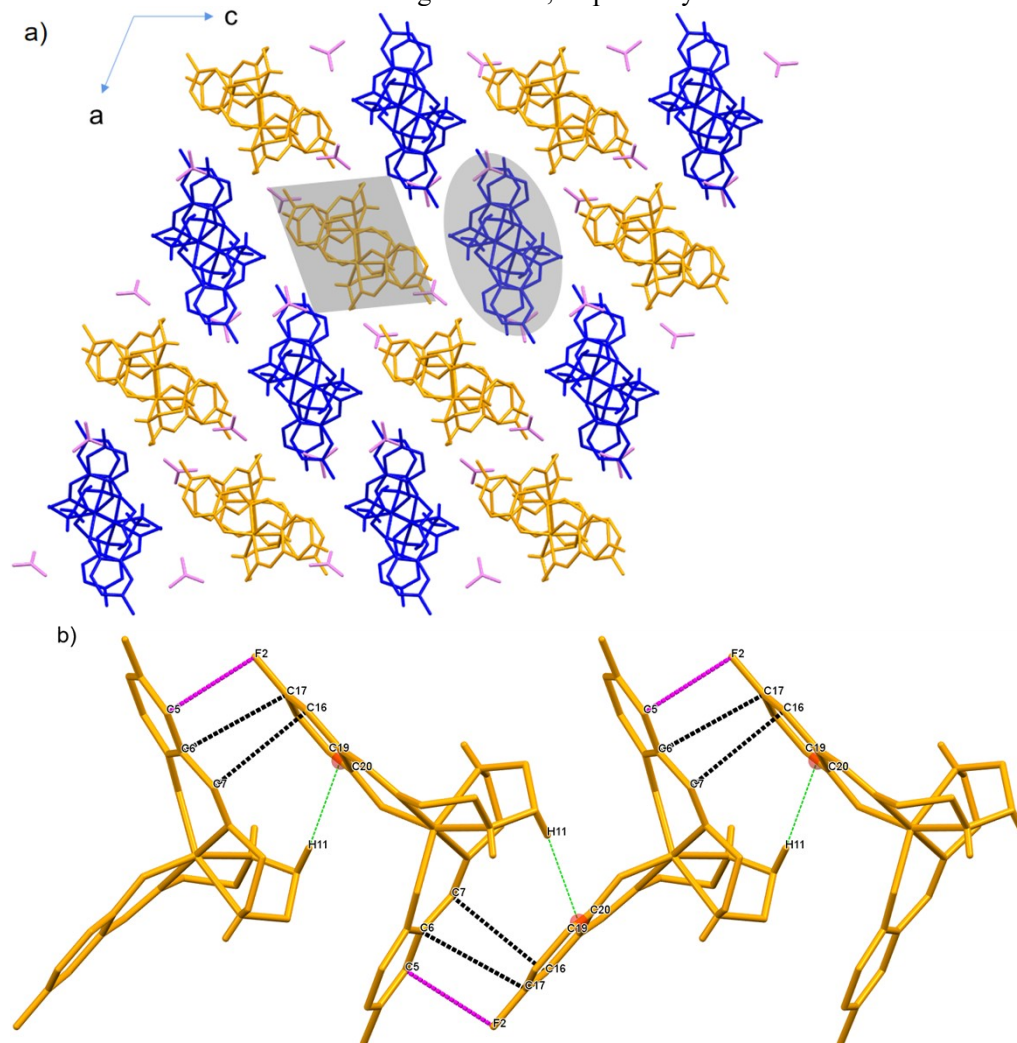

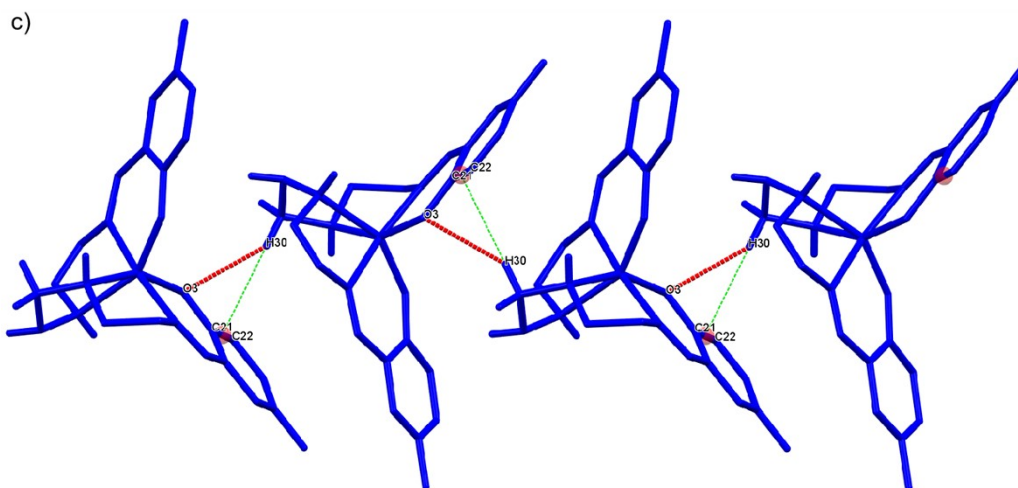

Figure S11. (a) Crystal packing of complex **4** at 300 K, viewed along the *b* axis. The Fe1 and Fe2 units are shown in orange and blue, respectively. (b) The formation of a supramolecular 1D chain (rhombus background) along the crystallographic *a* axis by means of C...C short contacts (black dotted line), p- $\pi$  (magenta dotted line) and C-H... $\pi$  (green dotted line) interactions. (c) The formation of a supramolecular 1D chain (ellipse background) along the crystallographic *c* axis by means of C-H... $\pi$  (green dotted line) and C-H...O (red dotted line) interactions.

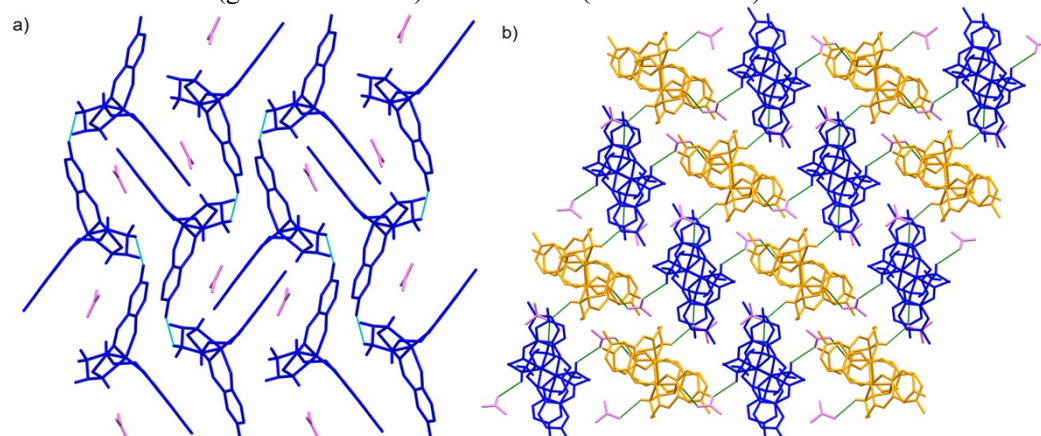

Figure S12. (a) C-H...F interactions (cyan dotted line) in **4** linking the chains into Fe2 plane. (b) N-H...O interactions (bottle green dotted line) linking the Fe1 and Fe2 centers in complex **4**. The Fe1 and Fe2 units are shown in orange and blue, respectively.

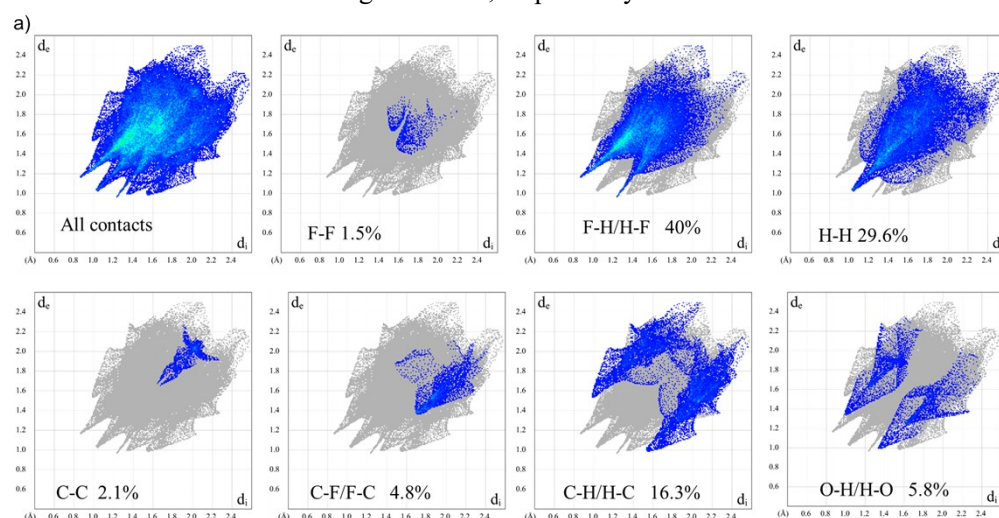

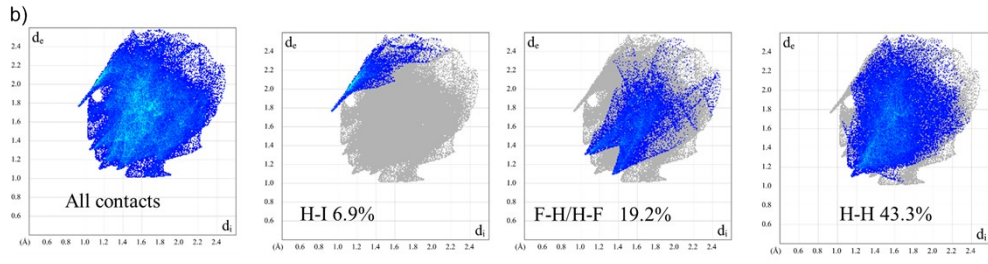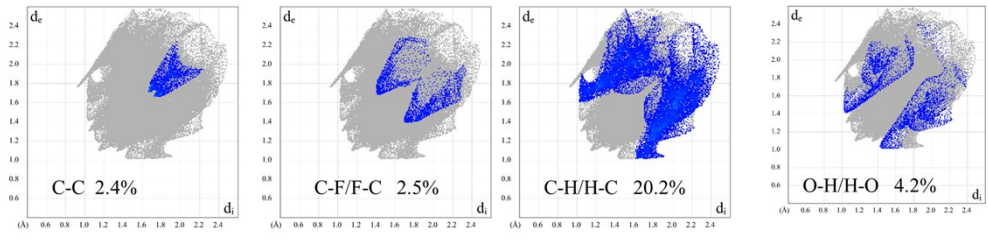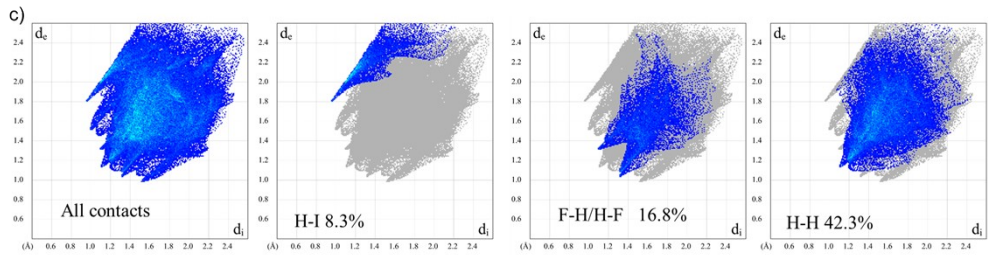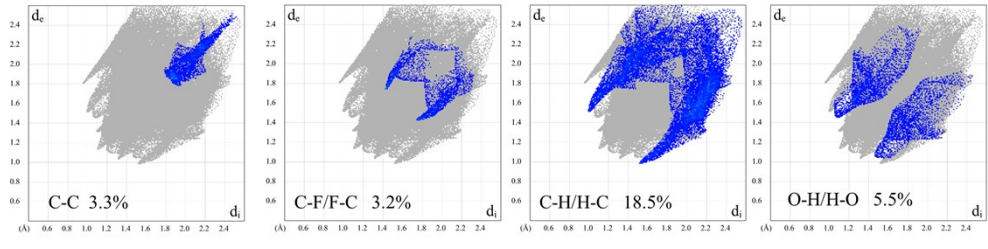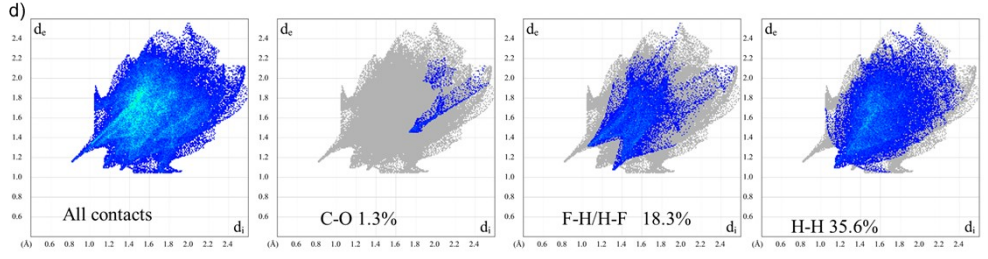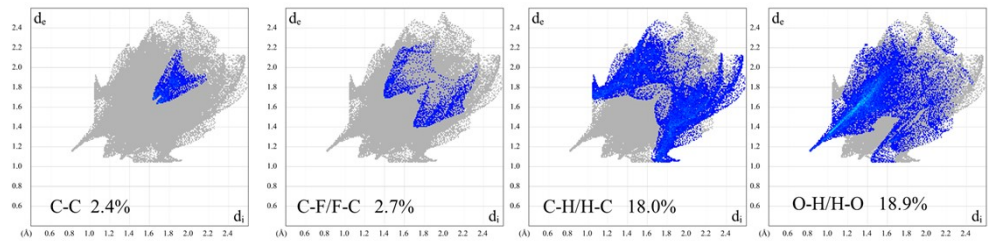

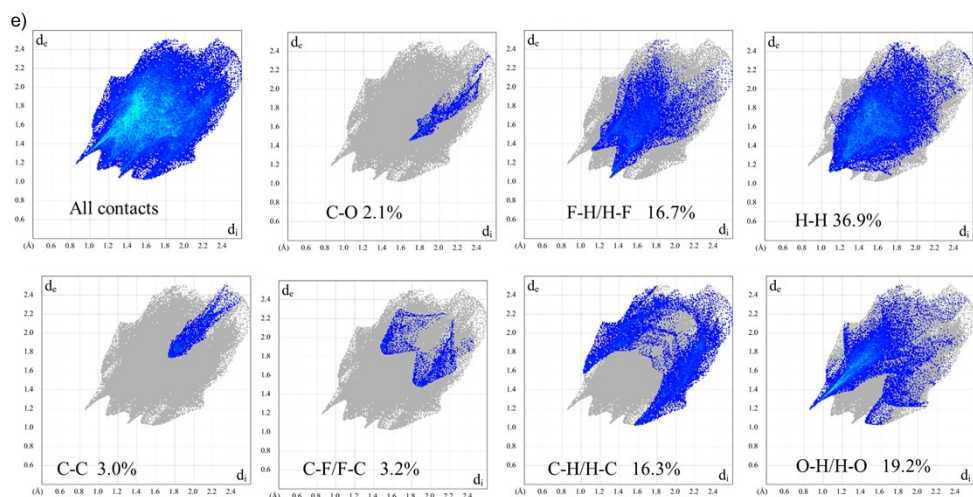

Figure S13. Hirshfeld surface 2D fingerprint plots: all contacts for (a) **1**, (b) Fe1 in **3**, (c) Fe2 in **3**, (d) Fe1 in **4**, (e) Fe2 in **4** at 100K.

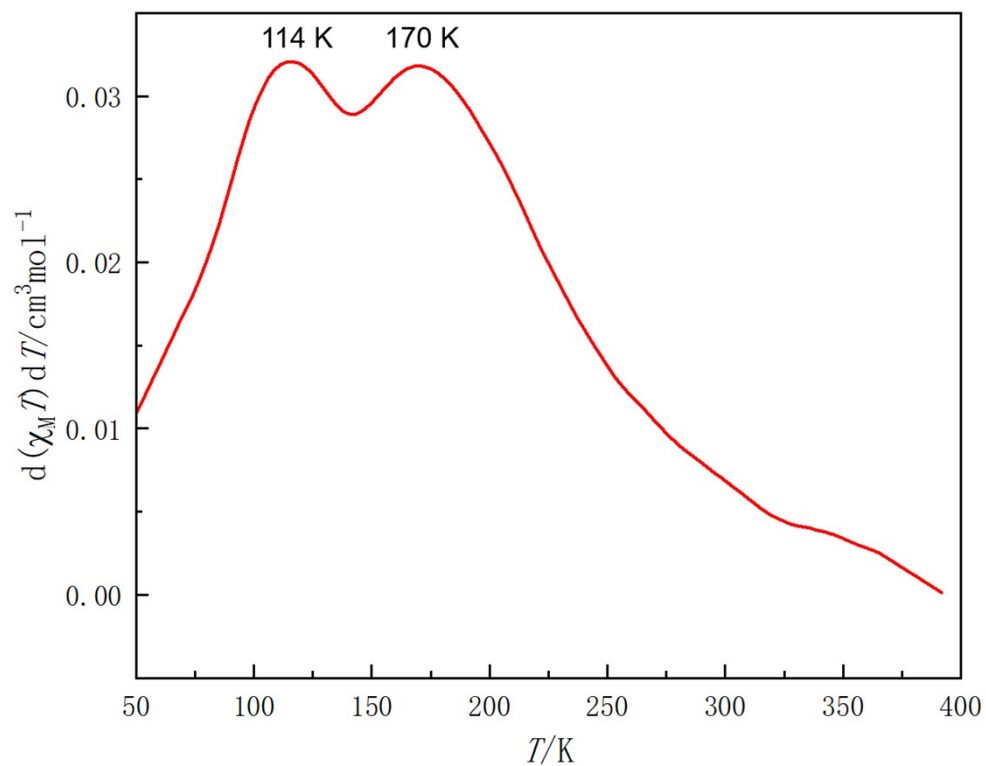

Figure S14. The first derivative of  $\chi_M T$  in the 50–400 K range in **2**.

100K Fe1

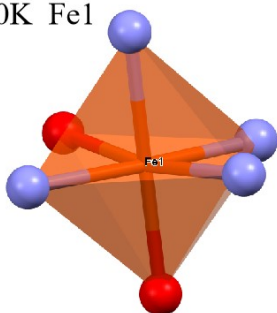

100K Fe2

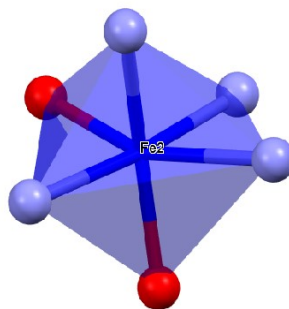

300K Fe1

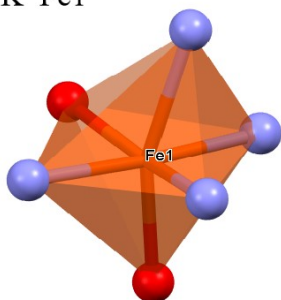

300K Fe2

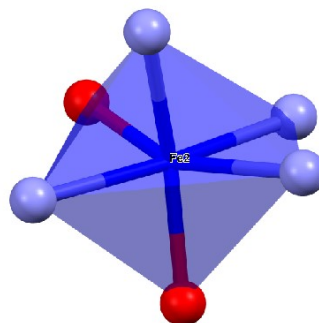

Figure S15. Geometries around Fe1 and Fe2 in **2**.
